# Supplementary material for: Investigation of the solid forms of deferasirox: solvate, co-crystal, and amorphous form
Source: Royal Society of Chemistry journal article supplement (doi:10.1039/c7ra08077h), 2017-01-01
Supplement: c7ra08077h1.pdf [file c7ra08077h1.pdf]

**Table S1** The PXRD peak positions of solid forms of deferasirox.

| Solid forms          | $2\theta$ values                                                             |
|----------------------|------------------------------------------------------------------------------|
| DFX                  | 6.6°, 10.1°, 10.6°, 13.2°, 14.1°, 15.4°, 16.6°, 23.2°, 25.7°, 26.2°          |
| DFX-H <sub>2</sub> O | 10.0°, 10.5°, 11.9°, 13.4°, 15.6°, 19.2°, 22.6°, 24.8°, 25.8°, 26.7°, 27.8°; |
| DFX-DMF              | 5.3°, 9.9°, 10.6°, 16.0°, 16.6°, 17.6°, 20.6°, 22.5°, 24.0°, 24.4°, 33.6°.   |
| DFX-INA              | 4.9°, 9.6°, 10.7°, 13.7°, 15.5°, 24.4°, 25.4°, 26.0°, 26.8°, 28.1°.          |
| DFX-2INA             | 4.8°, 11.2°, 16.5°, 22.9°, 23.4°, 24.1°, 25.1°, 25.9°, 26.8°, 27.6°.         |

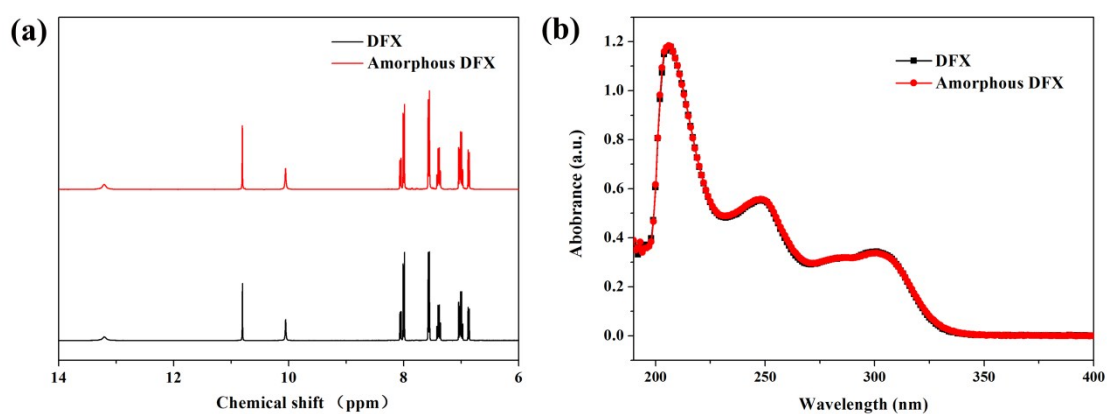

**Fig. S1** (a) The <sup>1</sup>H NMR spectra of amorphous DFX and commercial DFX; (b) the UV-Vis absorption spectra of amorphous DFX and commercial DFX.

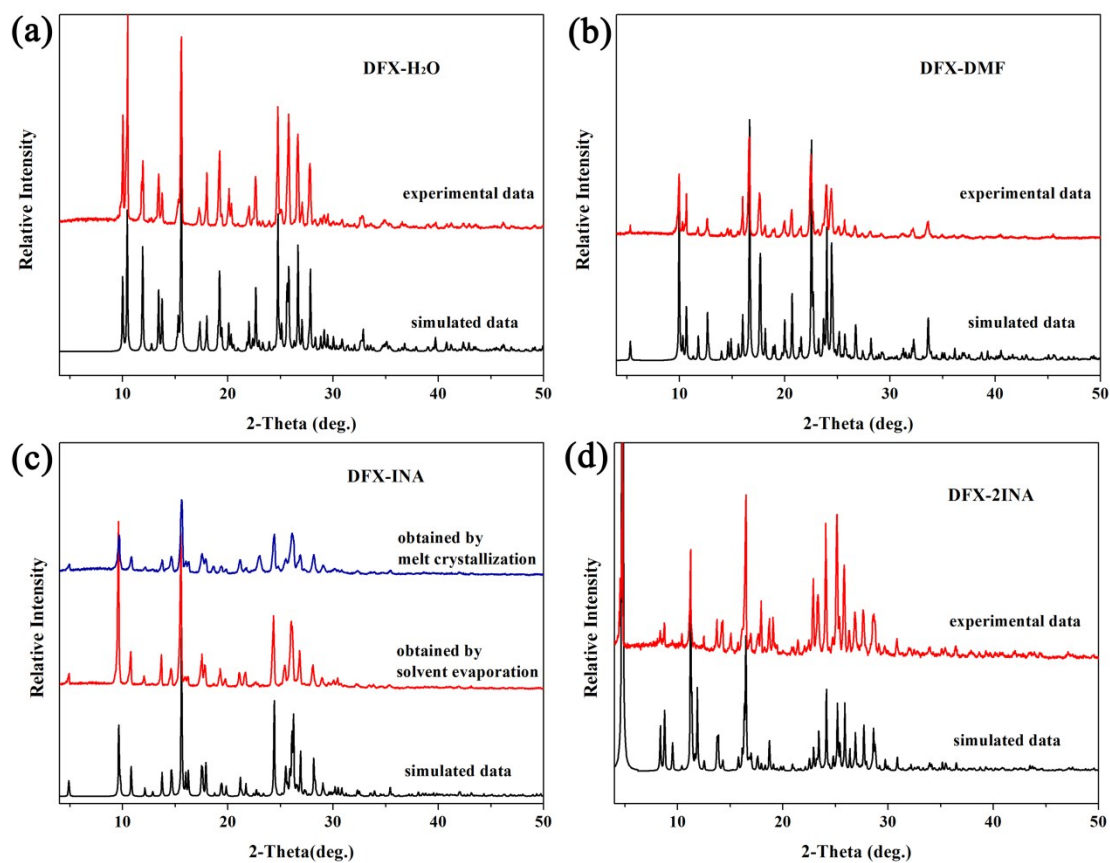

**Fig. S2** The PXRD patterns of (a) DFX-H<sub>2</sub>O, (b) DFX-DMF, (c) DFX-INA and (d) DFX-2INA matched with the corresponding simulated patterns.

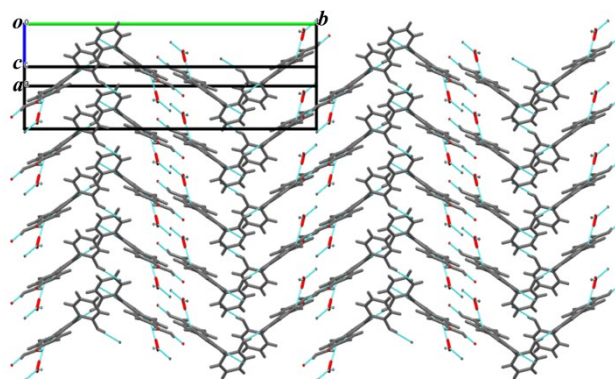

**Fig. S3** Packing diagram of DFX-H<sub>2</sub>O (DFX and H<sub>2</sub>O molecules are expressed in gray and red color, respectively).

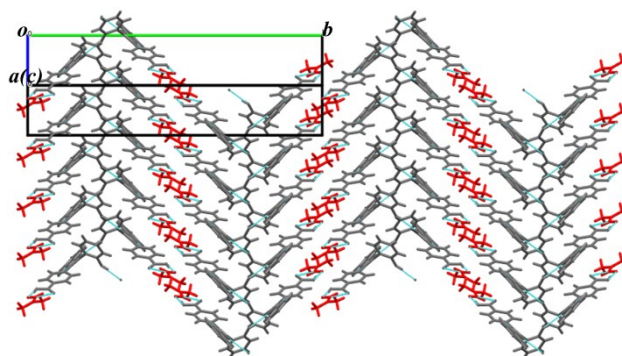

**Fig. S4** Packing diagram of DFX-DMF (DFX and DMF molecules are expressed in gray and red color, respectively).

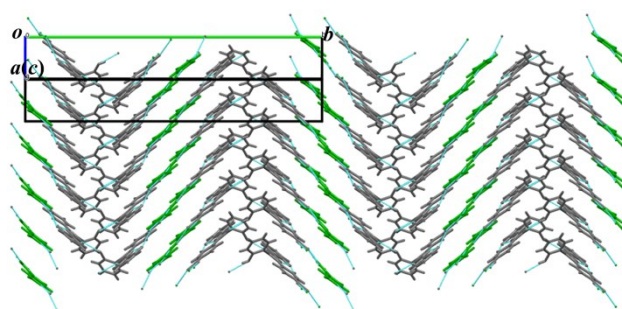

**Fig. S5** Packing diagram of DFX-INA (DFX and INA molecules are expressed in gray and green color, respectively).

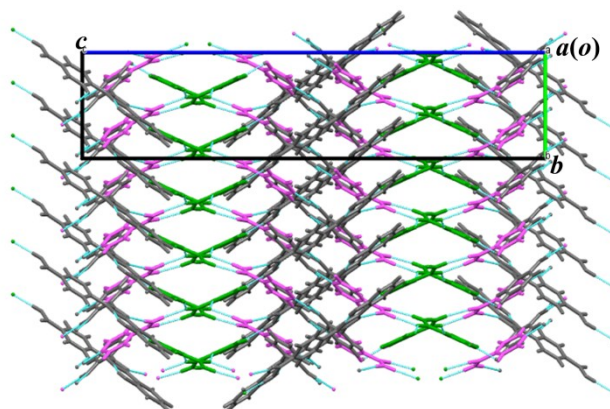

**Fig. S6** Packing diagram of DFX-2INA (DFX, I-INA, and II-INA molecules are expressed in gray, green, and pink color, respectively).

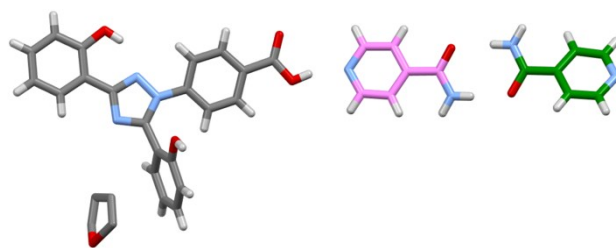

**Fig. S7** The single crystal structure of DFX-2INA without eliminating the THF carbon skeleton.

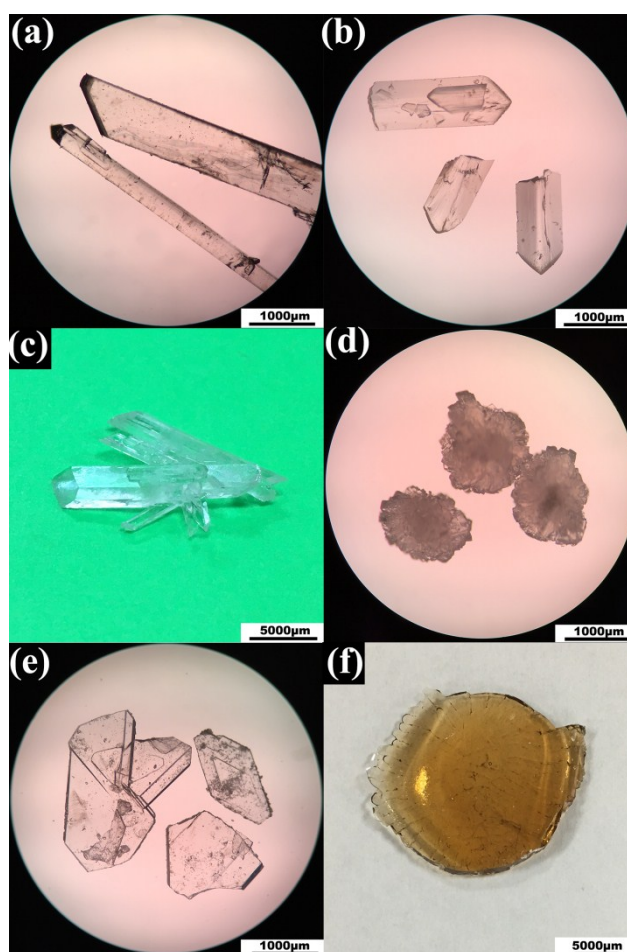

**Fig. S8** Morphological images of (a) commercial DFX crystallized from methanol, (b) DFX-H<sub>2</sub>O, (c) DFX-DMF, (d) DFX-INA, (e) DFX-2INA, and (f) amorphous DFX obtained by melt quenching.

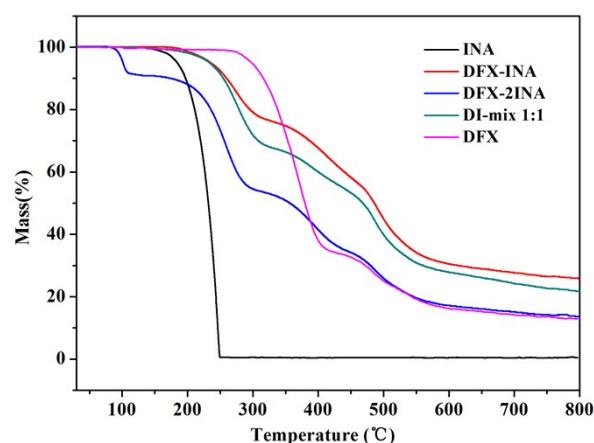

**Fig. S9** TGA curves of DFX, INA DFX-INA, DFX-2INA and DI-mix 1:1.

**Table S2** The cumulative drug release percentages of the three DFX solid forms

| Time point / min | cumulative drug release percentage / % |            |                      |                      |                |                |
|------------------|----------------------------------------|------------|----------------------|----------------------|----------------|----------------|
|                  | DFX in PBS                             | DFX in H2O | Amorphous DFX in PBS | Amorphous DFX in H2O | DFX-INA in PBS | DFX-INA in H2O |
| 0                | 0.00                                   | 0.00       | 0.00                 | 0.00                 | 0.00           | 0.00           |
| 2                | 2.43                                   | --         | 7.39                 | --                   | 11.60          | --             |
| 5                | 7.43                                   | --         | 23.31                | --                   | 32.76          | --             |
| 10               | 16.01                                  | 2.01       | 45.70                | 1.88                 | 51.50          | 0.70           |
| 20               | 25.22                                  | 3.93       | 62.96                | 3.80                 | 63.35          | 1.38           |
| 30               | 32.80                                  | 5.17       | 69.53                | 5.18                 | 67.32          | 2.07           |
| 40               | 38.54                                  | 5.87       | 73.78                | 6.40                 | 70.59          | 2.80           |
| 60               | 46.09                                  | 6.43       | 76.62                | 8.42                 | 73.40          | 3.96           |
| 120              | 60.16                                  | 6.79       | 82.89                | 12.53                | 79.62          | 6.64           |
| 180              | 68.36                                  | 7.23       | 83.26                | 15.56                | 83.09          | 8.50           |
| 240              | 74.00                                  | 7.70       | 87.61                | 16.94                | 84.56          | 9.56           |
